# Supplementary figures and images for: Tigecycline use in critically ill patients: a multicentre prospective observational study in the intensive care setting
Source: Springer Nature journal article supplement (doi:10.1007/s00134-014-3323-7), 2014-05-28

# Electronic supplement: Survival analysis assessed using Kaplan-Meier estimates

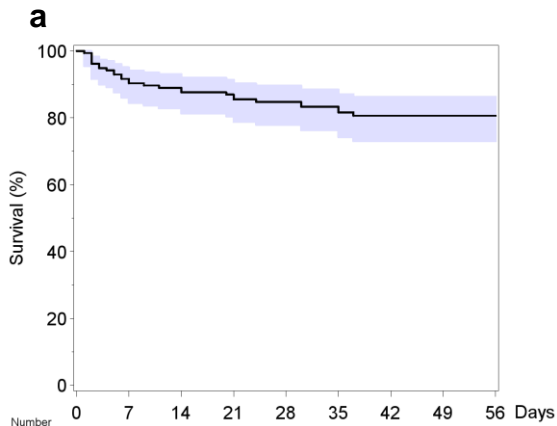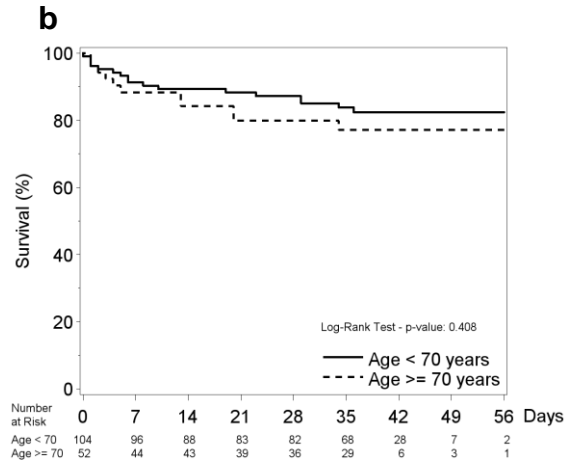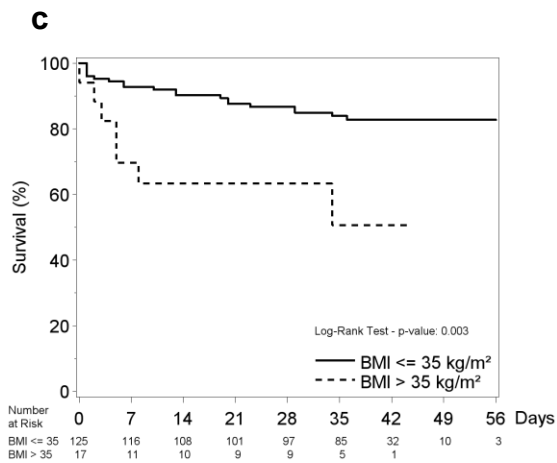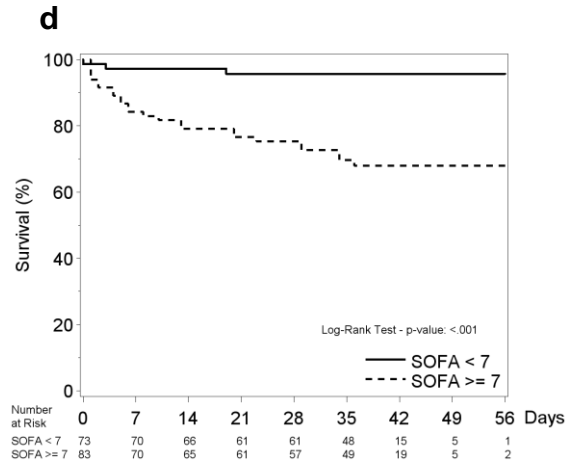

Supplement: MOESM1 [file 8123200]
